# Supplementary material
Source: HighWire-hosted journal article supplement (https://bmjopen.bmj.com/content/7/9/e013228)
Supplement: inline-supplementary-material-1 [file inline-supplementary-material-1.pdf]

**Supplementary Table 1: ORs and 95% CIs from a logistic regression model of later life depressive symptoms and any ACE using the complete case sample**

|                                         | Model A (n = 1741) |             | Model B (n = 1648) |             |
|-----------------------------------------|--------------------|-------------|--------------------|-------------|
|                                         | OR                 | 95% CI      | OR                 | 95% CI      |
| ACE (and Poor Perceived Social Support) |                    |             |                    |             |
| No                                      | 1                  | -           | 1                  | -           |
| Yes                                     | 2.99               | 1.67 – 5.37 | 3.00               | 1.63 - 5.54 |
| Perceived Social Support (and no ACE) † |                    |             |                    |             |
|                                         |                    | p = 0.14    |                    | p = 0.12    |
| Poor                                    | 1                  | -           | 1                  | -           |
| Moderate                                | 0.55               | 0.35 – 0.87 | 0.57               | 0.36 - 0.92 |
| Strong                                  | 0.36               | 0.22 – 0.58 | 0.35               | 0.21 - 0.58 |
| ACE x Perceived Social Support †        |                    |             |                    |             |
| No ACE x Poor Social Support            | 1                  | -           | 1                  | -           |
| ACE x Moderate Social Support           | 0.73               | 0.36 – 1.48 | 0.66               | 0.31 - 1.38 |
| ACE x Strong Social Support             | 0.45               | 0.20 – 1.02 | 0.42               | 0.18 - 0.97 |
| <i>Covariates</i>                       |                    |             |                    |             |
| Age (year)                              |                    | -           | 0.99               | 0.96 - 1.02 |
| Gender                                  |                    | -           |                    |             |
| Male                                    |                    |             | 1                  | -           |
| Female                                  |                    |             | 1.25               | 0.94 - 1.65 |
| Education                               |                    | -           |                    |             |
| Primary                                 |                    |             | 1                  | -           |
| Secondary                               |                    |             | 0.89               | 0.64 - 1.25 |
| Tertiary                                |                    |             | 0.69               | 0.46 - 1.03 |
| Current Marital Status                  |                    | -           |                    |             |
| Cohabiting/Married                      |                    |             | 1                  | -           |
| Separation/Divorce                      |                    |             | 1.82               | 1.12 - 2.96 |
| Single (never married)                  |                    |             | 1.32               | 0.81 - 2.15 |
| Widowed                                 |                    |             | 2.21               | 1.32 - 3.68 |
| General Medical Services (GMS Status)   |                    | -           |                    |             |
| Not Covered                             |                    |             | 1                  | -           |
| Covered                                 |                    |             | 1.16               | 0.86 – 1.55 |

† p-values are from the Type II Sum of Squares Likelihood ratio Chi<sup>2</sup> test for the interaction term.

**Supplementary Table 2: ORs and 95% CIs from a logistic regression model of later life depressive symptoms and abuse (n = 2047\*)**

|                                                  | Model A |             | Model B |             |
|--------------------------------------------------|---------|-------------|---------|-------------|
|                                                  | OR      | 95% CI      | OR      | 95% CI      |
| <b>Abuse (and Poor Perceived Social Support)</b> |         |             |         |             |
| No                                               | 1       | -           | 1       | -           |
| Yes                                              | 5.21    | 2.80 – 9.73 | 5.20    | 2.70 – 9.99 |
| <b>Perceived Social Support (and no ACE)</b>     |         |             |         |             |
| Poor                                             | 1       | -           | 1       | -           |
| Moderate                                         | 0.53    | 0.37 – 0.77 | 0.53    | 0.36 – 0.77 |
| Strong                                           | 0.36    | 0.24 – 0.54 | 0.35    | 0.24 – 0.53 |
| <b>Abuse x Perceived Social Support †</b>        |         |             |         |             |
| No Abuse x Poor Social Support                   | 1       | -           | 1       | -           |
| Abuse x Moderate Social Support                  | 0.59    | 0.28 – 1.25 | 0.62    | 0.29 – 1.34 |
| Abuse x Strong Social Support                    | 0.26    | 0.11 – 0.64 | 0.25    | 0.10 – 0.62 |
| <i>Covariates</i>                                |         |             |         |             |
| Age (year)                                       |         | -           | 0.99    | 0.97 – 1.01 |
| Gender                                           |         | -           |         |             |
| Male                                             |         |             | 1       | -           |
| Female                                           |         |             | 1.31    | 1.02 – 1.69 |
| Education                                        |         | -           |         |             |
| Primary                                          |         |             | 1       | -           |
| Secondary                                        |         |             | 0.92    | 0.69 – 1.24 |
| Tertiary                                         |         |             | 0.70    | 0.49 – 1.02 |
| Current Marital Status                           |         | -           |         |             |
| Cohabiting/Married                               |         |             | 1       | -           |
| Separation/Divorce                               |         |             | 0.76    | 0.51 – 1.66 |
| Single (never married)                           |         |             | 1.26    | 0.71 – 2.24 |
| Widowed                                          |         |             | 1.11    | 0.85 – 1.45 |
| General Medical Services (GMS Status)            |         | -           |         |             |
| Not Covered                                      |         |             | 1       | -           |
| Covered                                          |         |             | 1.11    | 0.85 – 1.45 |

\* Parameter estimates based on the complete sample with missing data accounted for with multiple imputation with predictive mean matching.

† p-values are from the Type II Sum of Squares Likelihood ratio Chi<sup>2</sup> test for the interaction term.

**Supplementary Table 3: ORs and 95% CIs from a logistic regression model of later life depressive symptoms and neglect**

(n = 2047\*)

|                                             | Model A |             | Model B |             |
|---------------------------------------------|---------|-------------|---------|-------------|
|                                             | OR      | 95% CI      | OR      | 95% CI      |
| Neglect (and Poor Perceived Social Support) |         |             |         |             |
| No                                          | 1       | -           | 1       | -           |
| Yes                                         | 3.42    | 1.81 – 6.45 | 3.30    | 1.76 – 5.12 |
| Perceived Social Support (and no ACE)       |         |             |         |             |
| Poor                                        | 1       | -           | 1       | -           |
| Moderate                                    | 0.50    | 0.35 – 0.72 | 0.50    | 0.34 – 0.77 |
| Strong                                      | 0.31    | 0.21 – 0.45 | 0.30    | 0.21 – 0.48 |
| Neglect x Perceived Social Support †        |         |             |         |             |
| No Neglect x Poor Social Support            | 1       | p = 0.17    | 1       | p = 0.16    |
| Neglect x Moderate Social Support           | 0.99    | 0.42 – 2.37 | 0.93    | 0.38 – 2.14 |
| Neglect x Strong Social Support             | 0.70    | 0.21 – 1.62 | 0.55    | 0.20 – 1.83 |
| <i>Covariates</i>                           |         |             |         |             |
| Age (year)                                  | -       | -           | 0.98    | 0.96 – 1.00 |
| Gender                                      | -       | -           | -       | -           |
| Male                                        | -       | -           | 1       | -           |
| Female                                      | -       | -           | 1.26    | 0.98 – 1.67 |
| Education                                   | -       | -           | -       | -           |
| Primary                                     | -       | -           | 1       | -           |
| Secondary                                   | -       | -           | 0.96    | 0.50 – 1.44 |
| Tertiary                                    | -       | -           | 0.70    | 0.48 – 1.02 |
| Current Marital Status                      | -       | -           | -       | -           |
| Cohabiting/Married                          | -       | -           | 1       | -           |
| Separation/Divorce                          | -       | -           | 0.76    | 0.50 – 1.17 |
| Single (never married)                      | -       | -           | 1.33    | 0.75 – 2.37 |
| Widowed                                     | -       | -           | 1.60    | 0.88 – 2.91 |
| General Medical Services (GMS Status)       | -       | -           | -       | -           |
| Not Covered                                 | -       | -           | 1       | -           |
| Covered                                     | -       | -           | 1.09    | 0.84 – 1.42 |

\* Parameter estimates based on the complete sample with missing data accounted for with multiple imputation with predictive mean matching.

† p-values are from the Type II Sum of Squares Likelihood ratio Chi<sup>2</sup> test for the interaction term.

**Supplementary Table 4: ORs and 95% CIs from a logistic regression model of later life depressive symptoms and household dysfunction (n = 2047\*)**

|                                                           | Model A |             | Model B |             |
|-----------------------------------------------------------|---------|-------------|---------|-------------|
|                                                           | ORs     | 95% CI      | ORs     | 95% CI      |
| Household dysfunction (and Poor Perceived Social Support) |         |             |         |             |
| No                                                        | 1       | -           | 1       | -           |
| Yes                                                       | 2.50    | 1.39 – 4.45 | 2.24    | 1.24 – 4.06 |
| Perceived Social Support (and no ACE)                     |         |             |         |             |
| Poor                                                      | 1       | -           | 1       | -           |
| Moderate                                                  | 0.48    | 0.33 – 0.69 | 0.47    | 0.32 – 0.68 |
| Strong                                                    | 0.30    | 0.20 – 0.44 | 0.29    | 0.20 – 0.43 |
| Household dysfunction x Perceived Social Support †        |         | p = 0.32    |         | p = 0.23    |
| No Household dysfunction x Poor Social Support            | 1       | -           | 1       | -           |
| Household dysfunction x Moderate Social Support           | 0.74    | 0.36 – 1.52 | 0.83    | 0.40 – 1.73 |
| Household dysfunction x Strong Social Support             | 0.55    | 0.24 – 1.25 | 0.56    | 0.24 – 1.29 |
| <i>Covariates</i>                                         |         |             |         |             |
| Age (year)                                                |         | -           | 0.98    | 0.96 – 1.00 |
| Gender                                                    |         | -           |         |             |
| Male                                                      |         |             | 1       | -           |
| Female                                                    |         |             | 1.34    | 1.05 – 1.74 |
| Education                                                 |         | -           |         |             |
| Primary                                                   |         |             | 1       | -           |
| Secondary                                                 |         |             | 0.89    | 0.66 – 1.19 |
| Tertiary                                                  |         |             | 0.70    | 0.49 – 1.01 |
| Current Marital Status                                    |         | -           |         |             |
| Cohabiting/Married                                        |         |             | 1       | -           |
| Separation/Divorce                                        |         |             | 0.72    | 0.48 – 1.09 |
| Single (never married)                                    |         |             | 1.29    | 0.74 – 2.25 |
| Widowed                                                   |         |             | 1.51    | 0.84 – 2.71 |
| General Medical Services (GMS Status)                     |         | -           |         |             |
| Not Covered                                               |         |             | 1       | -           |
| Covered                                                   |         |             | 1.11    | 0.85 – 1.44 |

\* Parameter estimates based on the complete sample with missing data accounted for with multiple imputation with predictive mean matching.

† p-values are from the Type II Sum of Squares Likelihood ratio Chi<sup>2</sup> test for the interaction term.

**Supplementary Table 5. ORs and 95% CIs from a logistic regression model of later life depressive symptoms and ACE score (n = 2047\*)**

|                                               | Model A (Unadjusted) |              | Model B (Fully Adjusted) |              |
|-----------------------------------------------|----------------------|--------------|--------------------------|--------------|
|                                               | OR                   | 95% CI       | OR                       | 95% CI       |
| ACE Score (and Poor Perceived Social Support) |                      |              |                          |              |
| 0                                             | 1                    | -            | 1                        | ---          |
| 1                                             | 1.44                 | 0.62 – 3.37  | 1.55                     | 0.65 – 3.66  |
| 2                                             | 3.08                 | 1.23 – 7.65  | 3.27                     | 1.29 – 8.28  |
| 3+                                            | 5.33                 | 2.56 – 11.10 | 5.18                     | 2.45 – 10.94 |
| Perceived Social Support (and ACE score = 0)  |                      |              |                          |              |
| Poor                                          | 1                    | -            | 1                        | -            |
| Moderate                                      | 0.53                 | 0.35 – 0.80  | 0.54                     | 0.35 – 0.81  |
| Strong                                        | 0.35                 | 0.23 – 0.54  | 0.36                     | 0.23 – 0.55  |
| ACE Score x Perceived Social Support †        |                      | p = 0.36     |                          | p = 0.26     |
| ACE Score 1 x Moderate Social Support         | 1.19                 | 0.44 – 3.15  | 1.17                     | 0.43 – 3.14  |
| ACE Score 1 x Strong Social Support           | 0.84                 | 0.28 – 2.49  | 0.78                     | 0.25 – 2.33  |
| ACE Score 2 x Moderate Social Support         | 0.78                 | 0.24 – 2.49  | 0.77                     | 0.24 – 2.50  |
| ACE Score 2 x Strong Social Support           | 0.75                 | 0.22 – 2.57  | 0.65                     | 0.19 – 2.26  |
| ACE Score 3+ x Moderate Social Support        | 0.69                 | 0.27 – 1.79  | 0.69                     | 0.26 – 1.81  |
| ACE Score 3+ x Strong Social Support          | 0.29                 | 0.09 – 0.91  | 0.27                     | 0.09 – 0.87  |
| <i>Covariates</i>                             |                      |              |                          |              |
| Age (year)                                    |                      | -            | 0.99                     | 0.96 – 1.01  |
| Gender                                        |                      | -            |                          |              |
| Male                                          |                      |              | 1                        | -            |
| Female                                        |                      |              | 1.35                     | 1.04 – 1.73  |
| Education                                     |                      | -            |                          |              |
| Primary                                       |                      |              | 1                        | -            |
| Secondary                                     |                      |              | 0.93                     | 0.69 – 1.24  |
| Tertiary                                      |                      |              | 0.68                     | 0.48 – 0.99  |
| Current Marital Status                        |                      | -            |                          |              |
| Cohabiting/Married                            |                      |              | 1                        | -            |
| Separation/Divorce                            |                      |              | 0.75                     | 0.49 – 1.14  |
| Single (never married)                        |                      |              | 1.21                     | 0.69 – 2.11  |
| Widowed                                       |                      |              | 1.59                     | 0.88 – 2.88  |
| General Medical Services (GMS Status)         |                      | -            |                          |              |
| Not Covered                                   |                      |              | 1                        | -            |
| Covered                                       |                      |              | 1.10                     | 0.85 – 1.43  |

\* Parameter estimates based on the complete sample with missing data accounted for with multiple imputation with predictive mean matching.

† p-values are from the Type II Sum of Squares Likelihood ratio Chi<sup>2</sup> test for the interaction term.

**Supplementary Table 6. ORs and 95% CIs from a logistic regression model of later life depressive symptoms and individual ACEs reflecting different forms of abuse (n = 2047\*)**

|                                         | ACE = |                | <u>Emotional Abuse</u> |                | <u>Physical Abuse</u> |                | <u>Sexual Abuse</u> |  |
|-----------------------------------------|-------|----------------|------------------------|----------------|-----------------------|----------------|---------------------|--|
|                                         | OR    | 95% CI         | OR                     | 95% CI         | OR                    | 95% CI         |                     |  |
| ACE (and Poor Perceived Social Support) | 4.85  | (2.49 to 9.42) | 3.92                   | (1.86 to 8.25) | 2.58                  | (0.96 to 6.92) |                     |  |
| Perceived Social Support (and no ACE)   |       |                |                        |                |                       |                |                     |  |
| Poor                                    | 1     | -              | 1                      | -              | 1                     | -              |                     |  |
| Moderate                                | 0.55  | (0.38 to 0.8)  | 0.48                   | (0.34 to 0.68) | 0.42                  | (0.3 to 0.59)  |                     |  |
| Strong                                  | 0.34  | (0.23 to 0.51) | 0.29                   | (0.2 to 0.42)  | 0.27                  | (0.19 to 0.38) |                     |  |
| ACE X Perceived Social Support †        |       | p = 0.012      |                        | p = 0.09       |                       | p = 0.24       |                     |  |
| ACE + Moderate Social Support           | 0.61  | (0.27 to 1.42) | 0.56                   | (0.22 to 1.43) | 1.48                  | (0.45 to 4.82) |                     |  |
| ACE + Strong Social Support             | 0.36  | (0.13 to 0.97) | 0.37                   | (0.12 to 1.12) | 0.57                  | (0.14 to 2.32) |                     |  |
| <i>Covariates</i>                       |       |                |                        |                |                       |                |                     |  |
| Age (year)                              | 0.98  | (0.96 to 1.01) | 0.98                   | (0.96 to 1)    | 0.98                  | (0.96 to 1)    |                     |  |
| Sex                                     |       |                |                        |                |                       |                |                     |  |
| Male                                    | 1     | -              | 1                      | -              | 1                     | -              |                     |  |
| Female                                  | 1.32  | (1.02 to 1.71) | 1.34                   | (1.04 to 1.72) | 1.30                  | (1.01 to 1.67) |                     |  |
| Education                               |       |                |                        |                |                       |                |                     |  |
| Primary                                 | 1     | -              | 1                      | -              | 1                     | -              |                     |  |
| Secondary                               | 0.93  | (0.69 to 1.25) | 0.96                   | (0.71 to 1.28) | 0.92                  | (0.69 to 1.23) |                     |  |
| Tertiary                                | 0.73  | (0.51 to 1.06) | 0.76                   | (0.53 to 1.08) | 0.70                  | (0.48 to 1)    |                     |  |
| Current Marital Status                  |       |                |                        |                |                       |                |                     |  |
| Married                                 | 1     | -              | 1                      | -              | 1                     | -              |                     |  |
| Divorced/Separated                      | 0.74  | (0.49 to 1.13) | 0.75                   | (0.49 to 1.15) | 0.75                  | (0.49 to 1.13) |                     |  |
| Single (Never Married)                  | 1.24  | (0.7 to 2.21)  | 1.35                   | (0.76 to 2.39) | 1.32                  | (0.75 to 2.33) |                     |  |
| Widowed                                 | 1.55  | (0.86 to 2.78) | 1.55                   | (0.85 to 2.83) | 1.54                  | (0.85 to 2.79) |                     |  |
| General Medical Services (GMS Status)   |       |                |                        |                |                       |                |                     |  |
| Not Covered                             | 1     | -              | 1                      | -              | 1                     | -              |                     |  |
| Covered                                 | 1.12  | (0.86 to 1.46) | 1.11                   | (0.85 to 1.44) | 1.09                  | (0.84 to 1.41) |                     |  |
| Intercept                               | 1.01  | (0.21 to 4.84) | 1.31                   | (0.29 to 5.99) | 1.81                  | (0.41 to 8.12) |                     |  |

\* Parameter estimates based on the complete sample with missing data accounted for with multiple imputation with predictive mean matching.

† p-values are from the Type II Sum of Squares Likelihood ratio Chi<sup>2</sup> test for the interaction term.

**Supplementary Table 7. ORs and 95% CIs from a logistic regression model of later life depressive symptoms and individual ACEs reflecting different forms of neglect (n = 2047\*)**

|                                         | ACE = |                | Physical Neglect |                 |
|-----------------------------------------|-------|----------------|------------------|-----------------|
|                                         | OR    | 95% CI         | OR               | 95% CI          |
| ACE (and Poor Perceived Social Support) | 3.35  | (1.74 to 6.43) | 3.43             | (0.96 to 12.26) |
| Perceived Social Support (and no ACE)   |       |                |                  |                 |
| Poor                                    | 1     | -              | 1                | -               |
| Moderate                                | 0.50  | (0.35 to 0.71) | 0.44             | (0.32 to 0.62)  |
| Strong                                  | 0.30  | (0.2 to 0.44)  | 0.27             | (0.19 to 0.38)  |
| ACE X Perceived Social Support †        |       | p = 0.15       |                  | P = 0.07        |
| ACE + Moderate Social Support           | 1.07  | (0.43 to 2.65) | 0.91             | (0.16 to 5.09)  |
| ACE + Strong Social Support             | 0.66  | (0.22 to 1.94) | **               | **              |
| <i>Covariates</i>                       |       |                |                  |                 |
| Age (year)                              | 0.98  | (0.96 to 1)    | 0.98             | (0.96 to 1)     |
| Sex                                     |       |                |                  |                 |
| Male                                    | 1     | -              | 1                | -               |
| Female                                  | 1.27  | (0.98 to 1.64) | 1.32             | (1.03 to 1.7)   |
| Education                               |       |                |                  |                 |
| Primary                                 | 1     | -              | 1                | -               |
| Secondary                               | 0.95  | (0.71 to 1.29) | 0.91             | (0.68 to 1.22)  |
| Tertiary                                | 0.70  | (0.48 to 1.01) | 0.74             | (0.51 to 1.05)  |
| Current Marital Status                  |       |                |                  |                 |
| Married                                 | 1     | -              | 1                | -               |
| Divorced/Separated                      | 0.80  | (0.53 to 1.21) | 0.74             | (0.48 to 1.13)  |
| Single (Never Married)                  | 1.43  | (0.82 to 2.49) | 1.37             | (0.78 to 2.42)  |
| Widowed                                 | 1.70  | (0.94 to 3.07) | 1.50             | (0.83 to 2.73)  |
| General Medical Services (GMS Status)   |       |                |                  |                 |
| Not Covered                             | 1     | -              | 1                | -               |
| Covered                                 | 1.10  | (0.85 to 1.44) | 1.08             | (0.83 to 1.41)  |

---

|           |      |                |      |               |
|-----------|------|----------------|------|---------------|
| Intercept | 1.21 | (0.26 to 5.63) | 1.89 | (0.42 to 8.5) |
|-----------|------|----------------|------|---------------|

---

\* Parameter estimates based on the complete sample with missing data accounted for with multiple imputation with predictive mean matching.

\*\* Estimation problems due to sparse data.

† p-values are from the Type II Sum of Squares Likelihood ratio  $\chi^2$  test for the interaction term.

---



**Supplementary Table 8. ORs and 95% CIs from a logistic regression model of later life depressive symptoms and individual ACEs reflecting different forms of household dysfunction (n = 2047\*)**

|                                         | ACE = <u>Parental separation/divorce</u> |                 | <u>Violence against mother</u> |                 | <u>Substance abuse in household</u> |                | <u>Mental illness in household</u> |                | <u>Incarceration of household member</u> |                 |
|-----------------------------------------|------------------------------------------|-----------------|--------------------------------|-----------------|-------------------------------------|----------------|------------------------------------|----------------|------------------------------------------|-----------------|
|                                         | OR                                       | 95% CI          | OR                             | 95% CI          | OR                                  | 95% CI         | OR                                 | 95% CI         | OR                                       | 95% CI          |
| ACE (and Poor Perceived Social Support) | 0.69                                     | (0.16 to 2.93)  | 2.75                           | (0.74 to 10.28) | 1.51                                | (0.69 to 3.31) | 3.83                               | (1.91 to 7.68) | 6.02                                     | (1.49 to 24.35) |
| Perceived Social Support (and no ACE)   |                                          |                 |                                |                 |                                     |                |                                    |                |                                          |                 |
| Poor                                    | 1                                        | -               | 1                              | -               | 1                                   | -              | 1                                  | -              | 1                                        | -               |
| Moderate                                | 0.43                                     | (0.31 to 0.59)  | 0.44                           | (0.32 to 0.61)  | 0.41                                | (0.3 to 0.58)  | 0.51                               | (0.36 to 0.72) | 0.45                                     | (0.32 to 0.62)  |
| Strong                                  | 0.24                                     | (0.17 to 0.35)  | 0.25                           | (0.18 to 0.36)  | 0.25                                | (0.18 to 0.37) | 0.30                               | (0.2 to 0.43)  | 0.27                                     | (0.19 to 0.38)  |
| ACE X Perceived Social Support †        |                                          | p = 0.94        |                                | p = 0.17        |                                     | p = 0.81       |                                    | p = 0.30       |                                          | p = 0.06        |
| ACE + Moderate Social Support           | 1.78                                     | (0.31 to 10.32) | 0.34                           | (0.06 to 2.1)   | 1.35                                | (0.52 to 3.5)  | 0.49                               | (0.19 to 1.27) | 0.51                                     | (0.07 to 3.52)  |
| ACE + Strong Social Support             | 1.86                                     | (0.23 to 14.83) | 0.68                           | (0.12 to 3.92)  | 0.81                                | (0.25 to 2.67) | 0.41                               | (0.14 to 1.2)  | **                                       | **              |
| <i>Covariates</i>                       |                                          |                 |                                |                 |                                     |                |                                    |                |                                          |                 |
| Age (year)                              | 0.97                                     | (0.95 to 1)     | 0.98                           | (0.95 to 1)     | 0.98                                | (0.96 to 1)    | 0.98                               | (0.96 to 1)    | 0.98                                     | (0.95 to 1)     |
| Sex                                     |                                          |                 |                                |                 |                                     |                |                                    |                |                                          |                 |
| Male                                    | 1                                        | -               | 1                              | -               | 1                                   | -              | 1                                  | -              | 1                                        | -               |
| Female                                  | 1.32                                     | (1.02 to 1.7)   | 1.31                           | (1.02 to 1.68)  | 1.32                                | (1.02 to 1.69) | 1.35                               | (1.04 to 1.73) | 1.32                                     | (1.03 to 1.71)  |
| Education                               |                                          |                 |                                |                 |                                     |                |                                    |                |                                          |                 |
| Primary                                 | 1                                        | -               | 1                              | -               | 1                                   | -              | 1                                  | -              | 1                                        | -               |
| Secondary                               | 0.89                                     | (0.66 to 1.19)  | 0.90                           | (0.67 to 1.2)   | 0.90                                | (0.67 to 1.21) | 0.90                               | (0.67 to 1.2)  | 0.89                                     | (0.66 to 1.19)  |
| Tertiary                                | 0.71                                     | (0.49 to 1.02)  | 0.72                           | (0.51 to 1.03)  | 0.71                                | (0.5 to 1.02)  | 0.70                               | (0.49 to 1)    | 0.72                                     | (0.51 to 1.04)  |
| Current Marital Status                  |                                          |                 |                                |                 |                                     |                |                                    |                |                                          |                 |
| Married                                 | 1                                        | -               | 1                              | -               | 1                                   | -              | 1                                  | -              | 1                                        | -               |
| Divorced/Separated                      | 0.72                                     | (0.47 to 1.09)  | 0.69                           | (0.46 to 1.02)  | 0.72                                | (0.48 to 1.08) | 0.72                               | (0.48 to 1.09) | 0.75                                     | (0.49 to 1.13)  |
| Single (Never Married)                  | 1.38                                     | (0.78 to 2.42)  | 1.31                           | (0.76 to 2.26)  | 1.30                                | (0.74 to 2.27) | 1.29                               | (0.74 to 2.26) | 1.40                                     | (0.8 to 2.46)   |
| Widowed                                 | 1.43                                     | (0.79 to 2.6)   | 1.41                           | (0.8 to 2.51)   | 1.44                                | (0.8 to 2.6)   | 1.51                               | (0.84 to 2.74) | 1.53                                     | (0.85 to 2.76)  |
| General Medical Services (GMS Status)   |                                          |                 |                                |                 |                                     |                |                                    |                |                                          |                 |
| Not Covered                             | 1                                        | -               | 1                              | -               | 1                                   | -              | 1                                  | -              | 1                                        | -               |
| Covered                                 | 1.11                                     | (0.85 to 1.45)  | 1.13                           | (0.87 to 1.46)  | 1.10                                | (0.85 to 1.43) | 1.10                               | (0.84 to 1.43) | 1.10                                     | (0.84 to 1.43)  |
| Intercept                               | 2.57                                     | (0.56 to 11.76) | 2.23                           | (0.5 to 9.94)   | 1.80                                | (0.4 to 8.21)  | 1.56                               | (0.34 to 7.12) | 2.07                                     | (0.45 to 9.44)  |

\* Parameter estimates based on the complete sample with missing data accounted for with multiple imputation with predictive mean matching.

\*\* Estimation problems due to sparse data.

† p-values are from the Type II Sum of Squares Likelihood ratio Chi<sup>2</sup> test for the interaction term.

**Supplementary Table 9. Beta coefficients and 95% CIs from quantile regression models of the median of depression scale scores (CES-D) and any ACE, any abuse, any neglect, or any household dysfunction (n = 2047\*)**

|                                       | ACE =   |                  | <u>Any ACE</u> |                  | <u>Any Abuse</u> |                  | <u>Any Neglect</u> |                  | <u>Any Dysfunction</u> |       |
|---------------------------------------|---------|------------------|----------------|------------------|------------------|------------------|--------------------|------------------|------------------------|-------|
|                                       | $\beta$ | 95%CI            | $\beta$        | 95%CI            | $\beta$          | 95%CI            | $\beta$            | 95%CI            | $\beta$                | 95%CI |
| ACE                                   | 7.19    | (2.54 to 11.85)  | 11.30          | (0.05 to 22.55)  | 14.07            | (6.7 to 21.44)   | 6.55               | (1.1 to 12.01)   |                        |       |
| Perceived Social Support (score)**    | -0.77   | (-0.96 to -0.58) | -0.89          | (-1.08 to -0.7)  | -0.78            | (-0.95 to -0.61) | -0.87              | (-1.06 to -0.68) |                        |       |
| ACE X Perceived Social Support        | -0.47   | (-0.9 to -0.03)  | -0.60          | (-1.61 to 0.4)   | -0.97            | (-1.61 to -0.32) | -0.44              | (-0.92 to 0.04)  |                        |       |
| <i>Covariates</i>                     |         |                  |                |                  |                  |                  |                    |                  |                        |       |
| Age (year)                            | -0.06   | (-0.13 to 0.01)  | -0.05          | (-0.12 to 0.02)  | -0.04            | (-0.11 to 0.02)  | -0.04              | (-0.11 to 0.03)  |                        |       |
| Sex                                   |         |                  |                |                  |                  |                  |                    |                  |                        |       |
| Male                                  |         |                  |                |                  |                  |                  |                    |                  |                        |       |
| Female                                | 0.68    | (-0.08 to 1.44)  | 0.47           | (-0.29 to 1.24)  | 0.56             | (-0.15 to 1.28)  | 0.75               | (-0.01 to 1.5)   |                        |       |
| Education                             |         |                  |                |                  |                  |                  |                    |                  |                        |       |
| Primary                               |         |                  |                |                  |                  |                  |                    |                  |                        |       |
| Secondary                             | -0.72   | (-1.68 to 0.24)  | 0.05           | (-0.92 to 1.02)  | 0.26             | (-0.7 to 1.22)   | -0.92              | (-1.85 to 0)     |                        |       |
| Tertiary                              | -1.89   | (-3.09 to -0.69) | -1.43          | (-2.59 to -0.26) | -0.84            | (-1.97 to 0.28)  | -1.94              | (-3.01 to -0.87) |                        |       |
| Current Marital Status                |         |                  |                |                  |                  |                  |                    |                  |                        |       |
| Married                               |         |                  |                |                  |                  |                  |                    |                  |                        |       |
| Divorced/Separated                    | -0.26   | (-1.63 to 1.11)  | -0.13          | (-1.59 to 1.33)  | -1.46            | (-3.09 to 0.16)  | -0.15              | (-1.5 to 1.19)   |                        |       |
| Single (Never Married)                | -0.27   | (-2.7 to 2.15)   | 0              | (-2.38 to 2.37)  | -0.87            | (-3.32 to 1.58)  | 0.39               | (-1.65 to 2.42)  |                        |       |
| Widowed                               | 2.43    | (0.1 to 4.76)    | 2.58           | (0.52 to 4.64)   | 1.31             | (-1.13 to 3.75)  | 2.19               | (-0.06 to 4.45)  |                        |       |
| General Medical Services (GMS Status) |         |                  |                |                  |                  |                  |                    |                  |                        |       |
| Not Covered                           |         |                  |                |                  |                  |                  |                    |                  |                        |       |
| Covered                               | 0.17    | (-0.58 to 0.93)  | 0.24           | (-0.52 to 1.01)  | 0.18             | (-0.54 to 0.89)  | 0.09               | (-0.68 to 0.86)  |                        |       |
| Intercept                             | 19.92   | (15.03 to 24.82) | 19.99          | (15.02 to 24.96) | 19.43            | (14.7 to 24.15)  | 19.98              | (15.12 to 24.84) |                        |       |

\* Parameter estimates based on the complete sample with missing data accounted for with multiple imputation with predictive mean matching.

\*\* In contrast to the other models reported, both the outcome (CESD) and Perceived Social Support, are both modelled using their continuous scores, rather than categorising them.
